# Supplementary material for: Combining Uranium, Boron, and Strontium Isotope Ratios (234U/238U, δ11B, 87Sr/86Sr) to Trace and Quantify Salinity Contributions to Rio Grande River in Southwestern United States
Source: Frontiers journal article supplement (doi:10.3389/frwa.2020.575216), 2021-02-01
Supplement: Data_Sheet_1.xlsx [file Data_Sheet_1.xlsx]

## Sheet: Sheet1
Site ID	Sample type	Sample Name	Latitude	Longitude	Distance from EBR (km)
RG-1	River	RG at EBR	33.1786	-107.202	0
RG-2	River	RG at Willamsburg	33.1102	-107.298	18
RG-3	River	RG at Percha Dam	32.8686	-107.304	53
RG-4	River	RG at NM 187	32.8091	-107.303	61.57
RG-5	River	RG at NM 391	32.6945	-107.213	76.07
RG-6	River	RG at NM 154	32.6677	-107.119	86.07
RG-7	River	RG at RV 185	32.516	-106.973	111.87
RG-8	River	RG at US 70	32.311	-106.827	144.17
RG-9	River	RG at NM 359	32.2638	-106.826	149.57
RG-10	River	RG at NM 28	32.2062	-106.76	158.94
RG-11	River	RG at NM 189	32.1134	-106.668	173.04
RG-12	River	RG at NM 225	31.9993	-106.636	185.94
RG-13	River	RG at TX 259	31.9148	-106.602	197.34
RG-14	River	RG at TX Racetrack	31.7992	-106.558	213.14
RG-15	River	RG at TX 273	31.7992	-106.558	215.02
Site ID	Sample type	Sample Name	Latitude	Longitude	Distance from EBR (km)	Sample ID
GW-1	Groundwater	GW well 1 at 391	32.6791	-107.213	77.77	RG1415-007
GW-2	Groundwater	GW well 2 at 185	32.3912	-106.845	135.17	RG1415-010
GW-3	Groundwater	GW well 3 at 28	32.2107	-106.759	159.44	RG1415-012
GW-4	Groundwater	GW well 4 at 28	32.1456	-106.722	168.24	RG1415-013
GW-5	Groundwater	GW well 5 at 28	32.1162	-106.703	175.28	RG1415-014
GW-6	Groundwater	GW well 6 at 28	32.1116	-106.696	176.17	RG1415-015
GW-7	Groundwater	GW well at 154	32.6679	-107.118	86.17	RG1516_007
GW-8	Groundwater	GW well at 372	32.2295	-106.78	156.23	RG1516_021
GW-9	Groundwater	GW well2 at 372	32.2534	-106.798	152.93	RG1516_038
GW-10	Groundwater	GW well at Shalem Colony Trail	32.3436	-106.849	138.59	RG1516-081
GW-11	Groundwater	GW well at 187	32.7337	-107.257	74.57	RG1516-085
GW-12	Groundwater	GW well at fairacres	32.3054	-106.847	149.01	RG1516-109
GW-13	Groundwater	GW well at Tres Sendas	32.2735	-106.843	149.17	RG1516-110
GW-14	Groundwater	GW MH Well 001	31.9369	-106.592	193.5	RG1415-17
GW-15	Groundwater	GW MH Well 002	31.9656	-106.623	193.5	RG1415-18
GW-16	Groundwater	GW MH Well 003	31.9656	-106.623	193.5	RG1415-19
GW-17	Groundwater	GW MH Well 004	31.9601	-106.613	193.07	RG1415-20
GW-18	Groundwater	GW MH Well 005	31.8314	-106.58	209.54	RG1415-21
GW-19	Groundwater	GW MH Well 006	31.8329	-106.59	208.24	RG1415-22
GW-20	Groundwater	GW MH Well 007	31.8307	-106.586	208.94	RG1415-23
GW-21	Groundwater	GW MH Well 008	31.8267	-106.593	208.54	RG1415-24
GW-22	Groundwater	GW MH Well 009	31.8265	-106.595	208.34	RG1415-25
GW-23	Groundwater	GW MH Well 010	31.8982	-106.647	200	RG1415-26
GW-24	Groundwater	GW MH Well 011	31.8983	-106.645	200	RG1415-27
GW-25	Groundwater	GW MH Well 012	31.8974	-106.646	200	RG1415-28
GW-26	Groundwater	GW MH Well 013	31.8624	-106.63	205	RG1415-29
GW-27	Groundwater	GW MH Well 014	31.8639	-106.631	205	RG1415-30
GW-28	Groundwater	GW MH Well 015	31.9468	-106.608	197	RG1415-31
GW-29	Groundwater	GW MH Well 016	31.9468	-106.608	197	RG1415-32
GW-30	Groundwater	GW MH Well 017	31.9165	-106.61	197	RG1415-33
GW-31	Groundwater	GW MH Well 018	31.8936	-106.613	200	RG1415-34
GW-32	Groundwater	GW MH Well 019	31.8718	-106.608	200	RG1415-35
GW-33	Groundwater	GW MH Well 020	31.9815	-106.66	186	RG1415-36
GW-34	Groundwater	GW MH Well 021	31.9698	-106.661	186	RG1415-37
GW-35	Groundwater	GW MH Well 022	31.9635	-106.66	186	RG1415-38
GW-36	Groundwater	GW MH Well 023	31.9549	-106.658	186	RG1415-39
GW-37	Groundwater	GW MH Well 024	31.9602	-106.661	186	RG1415-40
GW-38	Groundwater	GW MH Well 025	31.9454	-106.66	186	RG1415-41
GW-39	Groundwater	GW MH Well 026	31.9122	-106.657	186	RG1415-42
GW-40	Groundwater	GW MH Well 027	31.9928	-106.641	186	RG1415-43
GW-41	Groundwater	GW MH Well 028	31.9861	-106.633	186	RG1415-44
GW-42	Groundwater	GW MH Well 029	31.9846	-106.642	186	RG1415-45
GW-43	Groundwater	GW MH Well 030	31.9629	-106.632	186	RG1415-46
GW-44	Groundwater	GW MH Well 031	31.9561	-106.632	186	RG1415-47
GW-45	Groundwater	GW MH Well 032	31.9084	-106.632	200	RG1415-48
GW-46	Groundwater	GW MH Well 033	31.9083	-106.631	200	RG1415-49
GW-47	Groundwater	GW MH Well 034	31.8871	-106.645	200	RG1415-50
GW-48	Groundwater	GW MH Well 035	31.9221	-106.591	197	RG1415-51
GW-49	Groundwater	GW MH Well 036	31.9561	-106.638	197	RG1415-52
GW-50	Groundwater	GW MH Well 037	31.9249	-106.645	197	RG1415-53
GW-51	Groundwater	GW MH Well 038	31.9208	-106.656	197	RG1415-54
GW-52	Groundwater	GW MH Well 039	31.9337	-106.632	197	RG1415-55
GW-53	Groundwater	GW MH Well 040	31.937	-106.632	197	RG1415-56
GW-54	Groundwater	GW MH Well 041	31.9497	-106.642	197	RG1415-57
GW-55	Groundwater	GW MH Well 042	31.9564	-106.644	197	RG1415-58
GW-56	Groundwater	GW MH Well 043	31.9291	-106.645	197	RG1415-59
GW-57	Groundwater	GW MH Well 044	31.9253	-106.643	197	RG1415-60
GW-58	Groundwater	GW MH Well 045	31.9208	-106.641	197	RG1415-61
GW-59	Groundwater	GW MH Well 046	31.9094	-106.625	197	RG1415-62
GW-60	Groundwater	GW MH Well 047	31.8845	-106.655	197	RG1415-63
GW-61	Groundwater	GW MH Well 048	31.9888	-106.619	187	RG1415-64
GW-62	Groundwater	GW MH Well 049	31.9899	-106.619	187	RG1415-65
GW-63	Groundwater	GW MH Well 050	31.99	-106.619	187	RG1415-66
GW-64	Groundwater	GW MH Well 051	31.9896	-106.619	187	RG1415-67
GW-65	Groundwater	GW MH Well 052	31.8356	-106.694	211	RG1415-68
GW-66	Groundwater	GW MH Well 053	31.9096	-106.6	200	RG1415-69
GW-67	Groundwater	GW MH Well 054	31.9728	-106.594	187	RG1415-70
GW-68	Groundwater	GW MH Well 055	31.8806	-106.627	200	RG1415-71
GW-69	Groundwater	GW MH Well 056	31.9594	-106.613	187	RG1415-72
GW-70	Groundwater	GW MH Well 057	31.9592	-106.613	187	RG1415-73
GW-71	Groundwater	GW MH Well 058	31.9789	-106.62	187	RG1415-74
GW-72	Groundwater	GW MH Well 059	31.9784	-106.62	187	RG1415-75
GW-73	Groundwater	GW MH Well 060	31.9676	-106.609	187	RG1415-76
GW-74	Groundwater	GW MH Well 061	31.959	-106.607	187	RG1415-77
GW-75	Groundwater	GW MH Well 062	31.9482	-106.607	187	RG1415-78
GW-76	Groundwater	GW MH Well 063	31.9486	-106.607	187	RG1415-79
GW-77	Groundwater	GW MH Well 064	31.9329	-106.613	187	RG1415-80
GW-78	Groundwater	GW MH Well 065	31.949	-106.618	187	RG1415-81
GW-79	Groundwater	Hot spring T or C	33.1333	-107.249	25	RG1516-191
Site ID	Sample type	Sample Name	Latitude	Longitude	Distance from EBR (km)	Sample ID
DR-1	Canals and Drains	irrigation canal near 391	32.6767	-107.184	80.22	RG1516_005
DR-2	Canals and Drains	irrigation canal next to 154	32.6679	-107.118	86.17	RG1516_006
DR-3	Canals and Drains	irrigation canal near 154/2	32.6467	-107.072	92.52	RG1516_008
DR-4	Canals and Drains	irrigation canal Rincon Valley	32.4478	-106.888	126.17	RG1516_009
DR-5	Canals and Drains	irrigation canal RV-pecan field	32.4478	-106.888	126.17	RG1516_010
DR-6	Canals and Drains	irrigation canal near 189 (Vado)	32.1099	-106.674	174.37	RG1516_011
DR-7	Canals and Drains	irrigation canal near 154	32.6672	-107.132	86.17	RG1516_034
DR-8	Canals and Drains	Hatch canal	32.6661	-107.12	86.3	RG1516-054
DR-9	Canals and Drains	Mesilla lateral	32.2413	-106.767		RG1516-045
DR-10	Canals and Drains	RCA	31.8171	-106.533	216.8	RG1516-061
DR-11	Canals and Drains	Montoya drain	31.8189	-106.574	210.57	RG1516-062
DR-12	Canals and Drains	Westside drain	31.8533	-106.622	205.86	RG1516-063
DR-13	Canals and Drains	New Mexis-Montoya west	31.8278	-106.585	209.22	RG1516-064
DR-14	Canals and Drains	Fabens drain	31.506	-106.164	275.62	RG1516-066
DR-15	Canals and Drains	Tornillo drain	31.401	-106.026	291.12	RG1516-067
DR-16	Canals and Drains	Hatch drain	32.0372	-106.664	183.06	RG1516-068
DR-17	Canals and Drains	Vado drain	32.0372	-106.664	183.04	RG1516-069
DR-18	Canals and Drains	Drain Snow Rd/NM28	32.2173	-106.762	160	RG1516-078
DR-19	Canals and Drains	Fabens Waste Drain	31.5011	-106.16	275	RG1516-180
DR-20	Canals and Drains	River Spur Drain	31.5056	-106.164	275	RG1516-181
DR-21	Canals and Drains	Riverside Intercepting Drain	31.5057	-106.164	275	RG1516-182
DR-22	Canals and Drains	American Canal #1	31.78	-106.526	220	RG1516-173
DR-23	Canals and Drains	American Canal #2	31.7616	-106.508	220	RG1516-174
DR-24	Canals and Drains	Franklin Canal	31.7711	-106.448	225	RG1516-175
DR-25	Canals and Drains	Riverside Canal	31.6583	-106.327	247	RG1516-176
DR-26	Canals and Drains	Tornillo Canal	31.4957	-106.154	275	RG1516-178
DR-27	Canals and Drains	Fabens Waste Channel	31.4948	-106.154	275	RG1516-179
DR-28	Canals and Drains	Tornillo drain	31.3648	-105.95	291.12	RG1516-183
DR-29	Canals and Drains	Tornillo drain	31.3671	-105.95	291.12	RG1516-184
DR-30	Canals and Drains	Tornillo drain	31.3986	-106.01	285	RG1516-185
DR-31	Canals and Drains	Hideway drain	31.4116	-106.059	280	RG1516-186
DR-32	Canals and Drains	Hideway drain	31.3978	-106.062	280	RG1516-187
DR-33	Canals and Drains	Hideway drain	31.3973	-106.058	280	RG1516-188
DR-34	Canals and Drains	Hideway drain	31.4074	-106.059	280	RG1516-189
DR-35	Canals and Drains	Faben drain	31.4823	-106.139	275	RG1516-190
Site ID	Sample type	Sample Name	Latitude	Longitude	Distance from EBR (km)	Sample ID
UB-1	Urban drains and WWTP	Las Cruces WWTP	32.2931	-106.823	146.42	RG1516-046
UB-2	Urban drains and WWTP	Haskell WWTP	31.7603	-106.442	229.12	RG1516-056
UB-3	Urban drains and WWTP	NW WWTP	31.7883	-106.525	217.42	RG1516-057
UB-4	Urban drains and WWTP	Sunland Park WWTP	31.797	-106.558	213.4	RG1516-059
UB-5	Urban drains and WWTP	RB WWTP	31.6542	-106.318	247.32	RG1516-065
UB-6	Urban drains and WWTP	RB WWTP discharge pipe	31.6543	-106.317	247.32	RG1516-177
UB-7	Urban drains and WWTP	El Paso drain at Racetrack	31.8063	-106.552	213	RG1516-073
